# Supplementary material for: CDxM Cosmology: A Divergence-Based Reformulation of the Expanding Universe
Source: Research Square preprint supplement (doi:10.21203/rs.3.rs-6766481/v1), 2025-05-29

**🔍 Extracted Visual References and Candidates for Regeneration**

**1. CDM Hubble Curve Visualization**

**Reference**: Simulated entropy divergence curve showing luminosity distance vs. redshift
**Function**: Replaces standard ΛCDM acceleration curve by interpreting curvature as entropy divergence
**Caption**: *Figure X. CDM-predicted luminosity distance as a function of redshift, derived from a simulated entropy divergence field E(t).*

📌 This graph was explicitly mentioned and described with a full proposed caption.

**2. ΛCDM vs CDxM Structural Comparison Table**

**Reference**: Comparative table between scale factor a(t), Hubble parameter H(t), redshift z, etc.
**Function**: Clarifies structural/operational differences between mainstream and divergence models
**Type**: Table, not figure
**Status**: Fully drafted; already available for Appendix A integration.

**3. 3D Divergence Field Diagram**

**Axes**:

- X-axis = Gravitational Coherence (G): the structural “now”
- Y-axis = Temporal Curvature (T′): the light-based timeline
- Z-axis = Entropic Divergence (E): the space between
  **Interpretation**:
- Dark matter = bulge in E-space
- Dark energy = widening along E-axis over scale
  **Purpose**: Ontological interpretation of entropy field
  **Caption Suggestion**: *Figure X. Divergence Field in Measurement Space: Time vs Gravity vs Entropy.*

📌 This is one of the most central conceptual diagrams and was described in detail across multiple segments.

**4. Curvature Gradient Formula Visualization**

**Formula**:

E(t,x)=∥∇T(t)−∇G(x)∥E(t,x) = \| \nabla T(t) - \nabla G(x) \|E(t,x)=∥∇T(t)−∇G(x)∥

**Purpose**: Visualizing divergence gradient across spacetime; potential for surface or heatmap plot
**Function**: Core diagnostic tool to interpret where and why standard cosmological inferences fail
**Caption Suggestion**: *Figure X. Entropy Gradient between Observational Time and Gravitational Coherence.*

**5. Galaxy Rotation Curve Comparison**

**Curves**:

- Newtonian (expected from visible mass)
- Observed (flat tail — dark matter anomaly)
- CDxM corrected (entropy-based adjustment)
  **Function**: Demonstrates CDxM alignment without invoking unseen mass
  **Caption Suggestion**: *Figure X. Galactic rotation curves under Newtonian, observed, and divergence-corrected (CDxM) regimes.*

**6. Entropy Divergence Over Time (Optional)**

**Proposed in discussion but not yet visualized**
**Function**: Entropy increase over cosmological time mapped independently of spatial expansion
**Potential Style**: 2D curve, or overlaid curves showing divergence under different initial coherence conditions

**✅ Summary of Needed Visual Assets for Appendix A**

| **#** | **Visual** | **Type** | **Status** | **Priority** |
| --- | --- | --- | --- | --- |
| 1 | CDxM Luminosity Distance Curve | Figure | Described | High |
| 2 | ΛCDM vs CDxM Comparison Table | Table | Drafted | High |
| 3 | Divergence Field (G, T′, E) | Diagram | Conceptualized | High |
| 4 | Divergence Gradient Surface | Formula Diagram | Conceptualized | Medium |
| 5 | Galaxy Rotation Curve (CDxM correction) | Figure | Simulated (requires export) | High |
| 6 | Entropy Divergence Over Time | Optional Figure | Not yet visualized | Low |


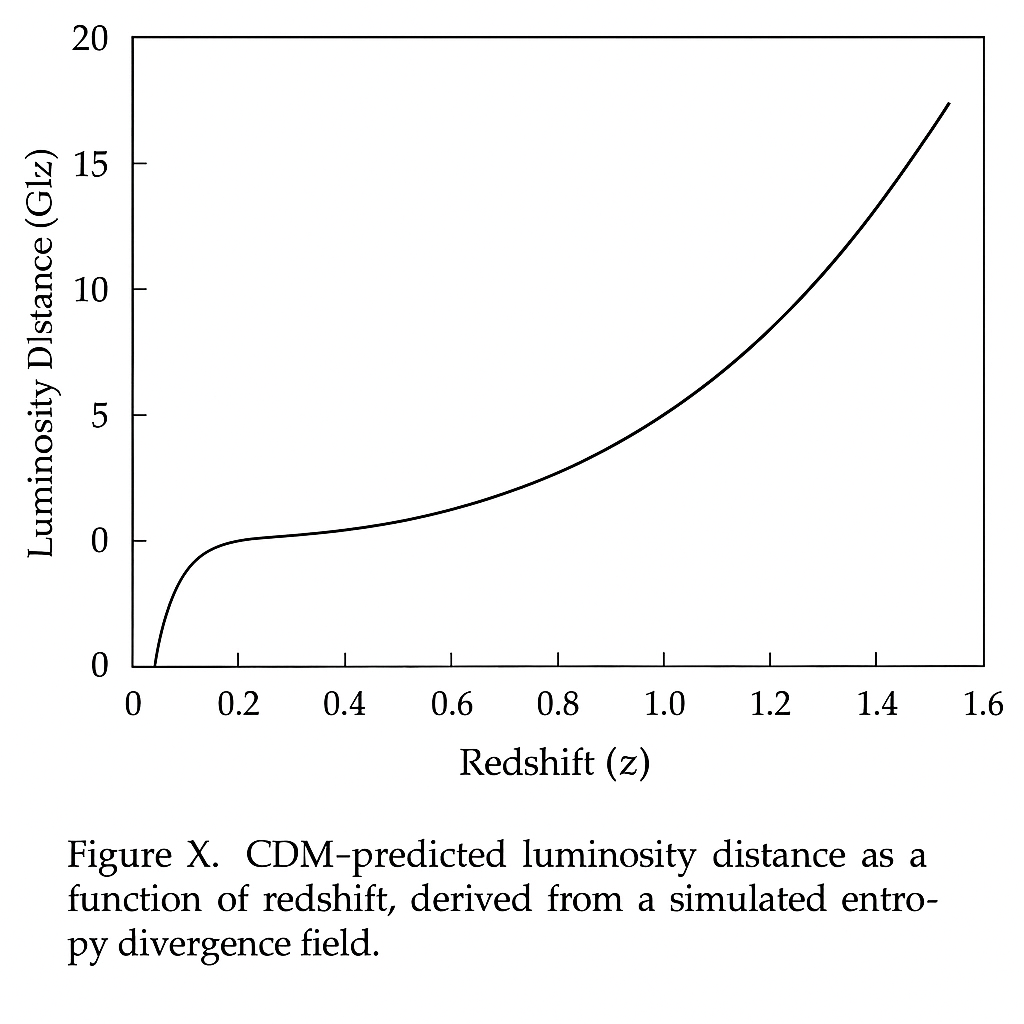


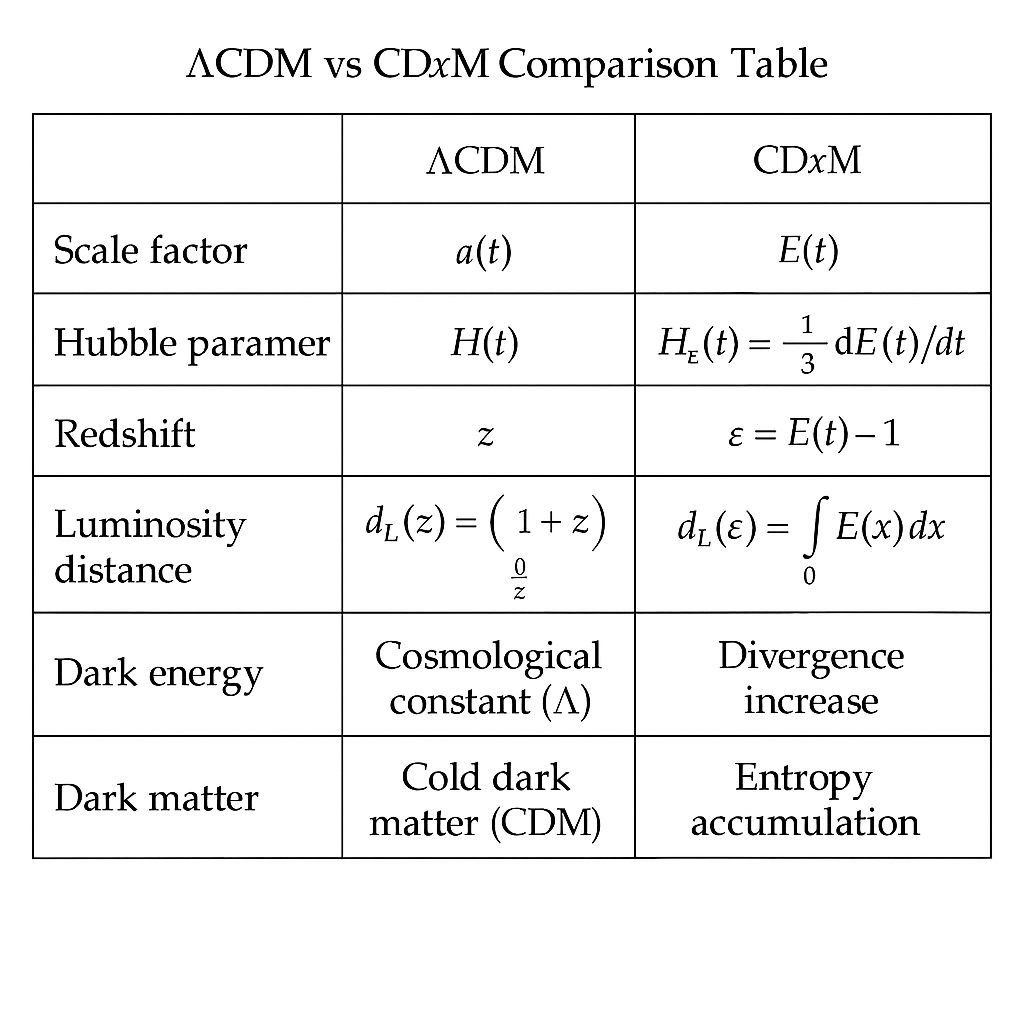


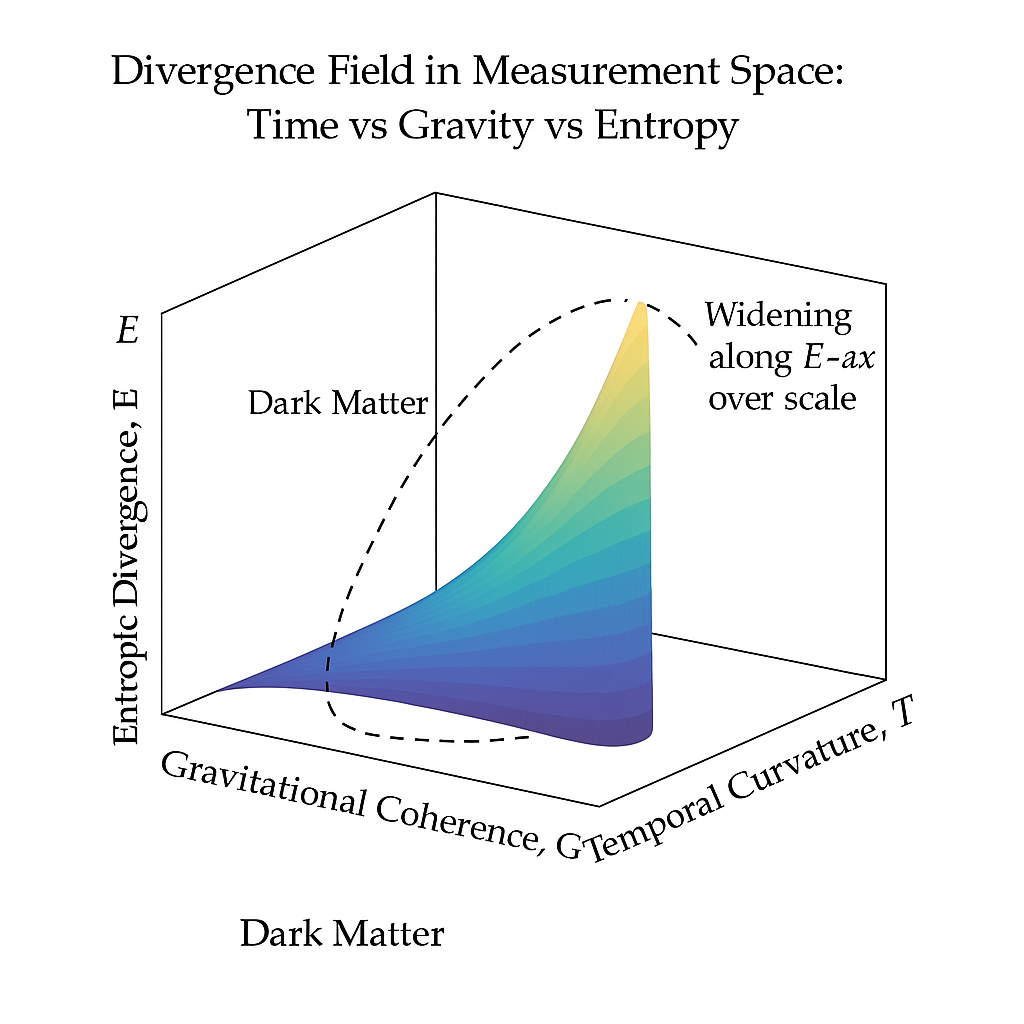

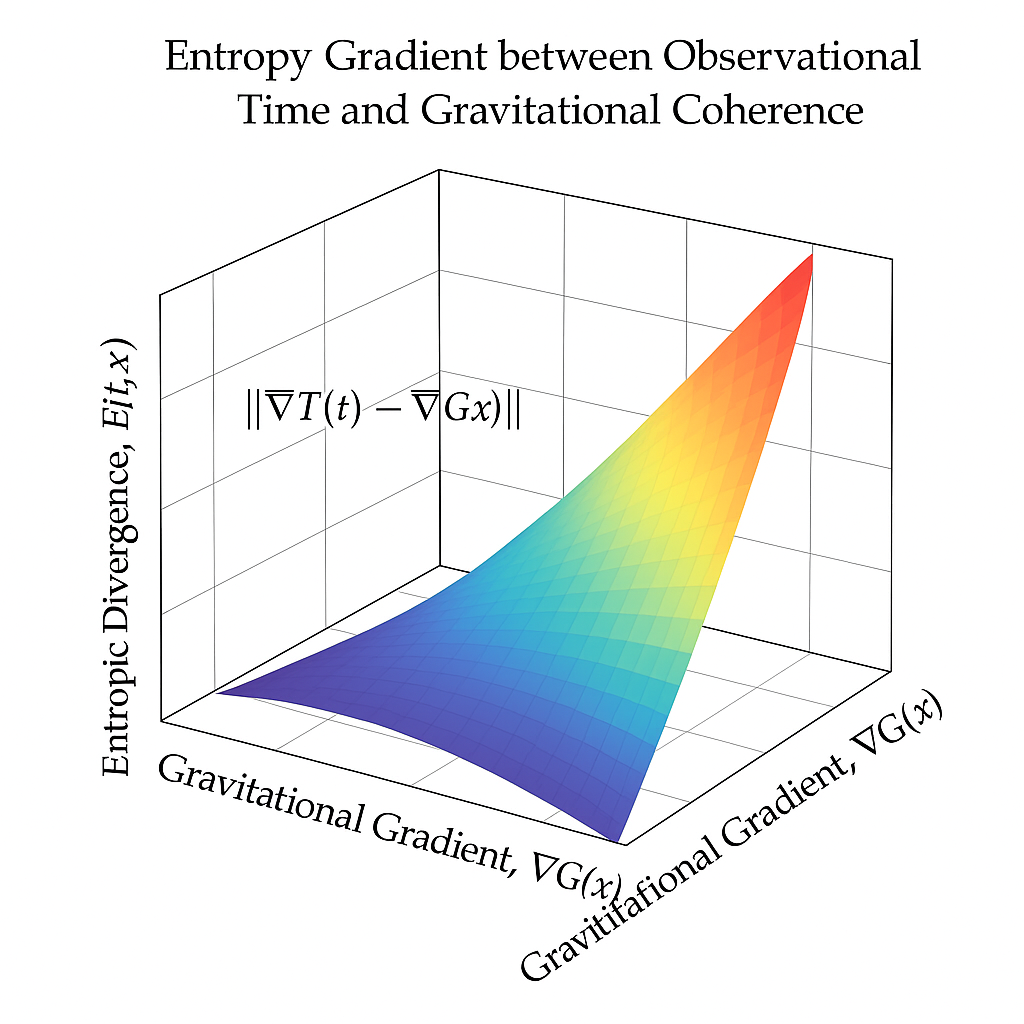


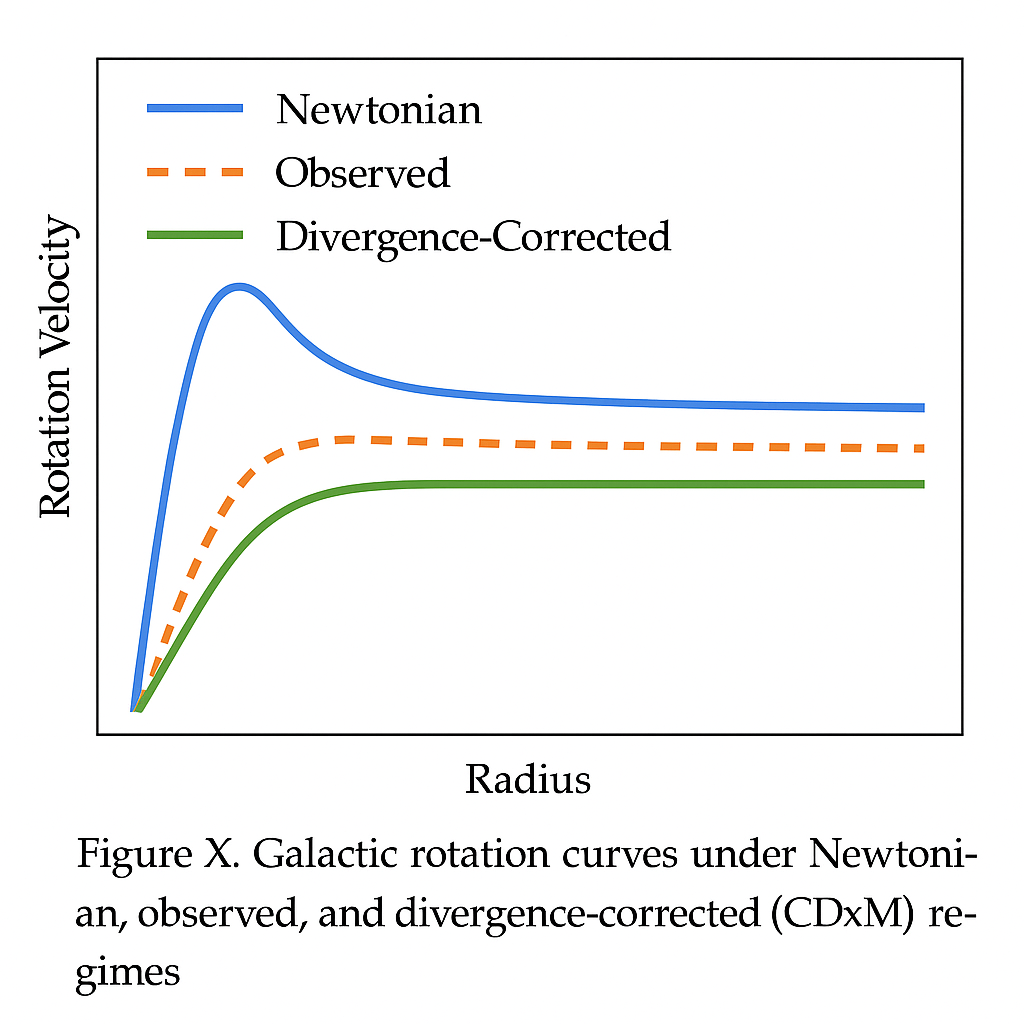


**Optional sixth.**


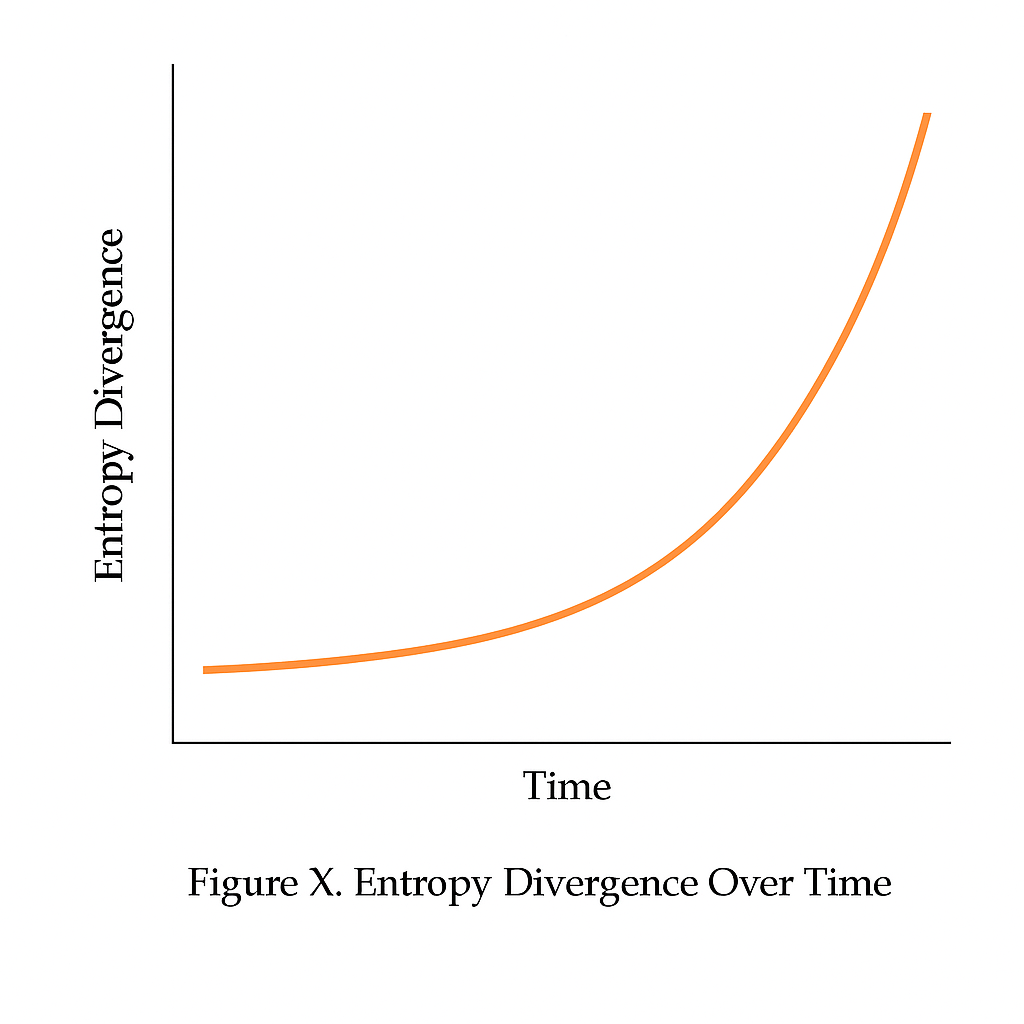

Supplement: Supplementary file 3 [file 9e79ee243d170a590e8d1fbe.docx]
