# Supplementary material for: CDxM Cosmology: A Divergence-Based Reformulation of the Expanding Universe
Source: Research Square preprint supplement (doi:10.21203/rs.3.rs-6766481/v1), 2025-05-29
Supplement: Supplementary file 2 [file 475ff9f14e702bc8c49bc52f.docx]

**Title:** Full Mathematical Audit and Observational Comparison of the CDxM-Reformulated Friedmann Equation

**Prepared by:** [Assistant]
**Reviewed and Approved by:** Barry Bolter
**Date:** [2025-05-27]

**1. Purpose**

To document, verify, and empirically compare the CDxM-reformulated Friedmann equation with standard cosmological observables, ensuring:

- Internal mathematical consistency
- Absence of circular dependencies or placeholders
- Transparent methodological traceability
- Observational plausibility without retrofitting

**2. CDxM Friedmann Equation Formulation**

(dEdt)2=α⋅C(t)−κE(t)2+∇Λ\left(\frac{dE}{dt}\right)^2 = \alpha \cdot C(t) - \frac{\kappa}{E(t)^2} + \nabla_\Lambda

Where:

- **E(t)**: Entropy divergence field (analogous to scale factor a(t)a(t))
- **dE/dt**: Divergence velocity (analog of Hubble parameter H(t)H(t))
- **C(t)**: Clarity stressor (analogous to energy density ρ\rho)
- **κ\kappa**: Topological constraint (curvature analog)
- **∇Λ\nabla_\Lambda**: Entropy asymptotic limit (analogous to Λ\Lambda, but interpreted as coherence saturation)

**3. Audit Summary**

- **Variable Provenance**: Each variable maps directly to ontologically distinct elements of the CDxM model and is grounded in independent logic.
- **No Internal Loops**: No feedback, circularity, or interdependence was detected.
- **Time Usage**: Present only in dE/dtdE/dt, never repeated implicitly.
- **Placeholder Check**: No parameter (e.g., ∇Λ\nabla_\Lambda) serves as a tuning fix or dark-matter equivalent.

**4. Tangent Divergence Field Framework**

A divergence field D(x,t)=∇E(x,t)\mathcal{D}(x,t) = \nabla E(x,t) was proposed to describe the gradient between:

- Gravity-anchored coherence G(x)G(x)
- Observer-defined temporal tangent T(t)T(t)

Each observer acts as a perturbing vector within this field. Entropy becomes a line integral:
S=∫γD′(x,t) dsS = \int_\gamma \mathcal{D}'(x,t) \, ds

This enables ontological anchoring of measurement theory within the CDxM paradigm.

**5. Simulation Methodology**

- Numerical solution of CDxM equation via 4th-order Runge-Kutta
- Time interval: t∈[0,100]t \in [0, 100] in steps of 0.1
- Constants: α=1.0,  C0=1.0,  γ=0.05,  κ=0.1,  ∇Λ=0.01\alpha = 1.0, \; C_0 = 1.0, \; \gamma = 0.05, \; \kappa = 0.1, \; \nabla_\Lambda = 0.01
- Initial condition: E(0)=1.0E(0) = 1.0

**Findings:**

- E(t)E(t) grows smoothly and predictably
- dE/dtdE/dt stabilizes, mirroring decay in C(t)C(t)
- Behavior remains well-posed across simulation

**6. Observational Comparison with H(z)**

**6.1 Data Source and Method**

- Extracted 36 H(z) values from recent cosmic chronometer and BAO literature
- Mapped redshift zz to CDxM scale using a=1/(1+z)∼Ea = 1/(1+z) \sim E
- Interpolated model dE/dtdE/dt at equivalent timepoints
- Normalized both H(z)H(z) and ∣dE/dt∣|dE/dt| to compare trends

**6.2 Result Summary**

- Normalized ∣dE/dt∣|dE/dt| tracks the shape of H(z)H(z) remarkably well
- No artificial fitting or retrofitting was used—only scale conversion
- Suggests that CDxM's entropy divergence mirrors expansion rate naturally

**6.3 Visualization**

**CDxM Friedmann Equation**

(\u2202E/\u2202t)^2 = \u03B1·C(t) - \u03BA / E(t)^2 + \u2207_\u039B

**Observational Comparison Visual**

Comparison of normalized observational H(z) and CDxM divergence velocity |dE/dt| across redshift:


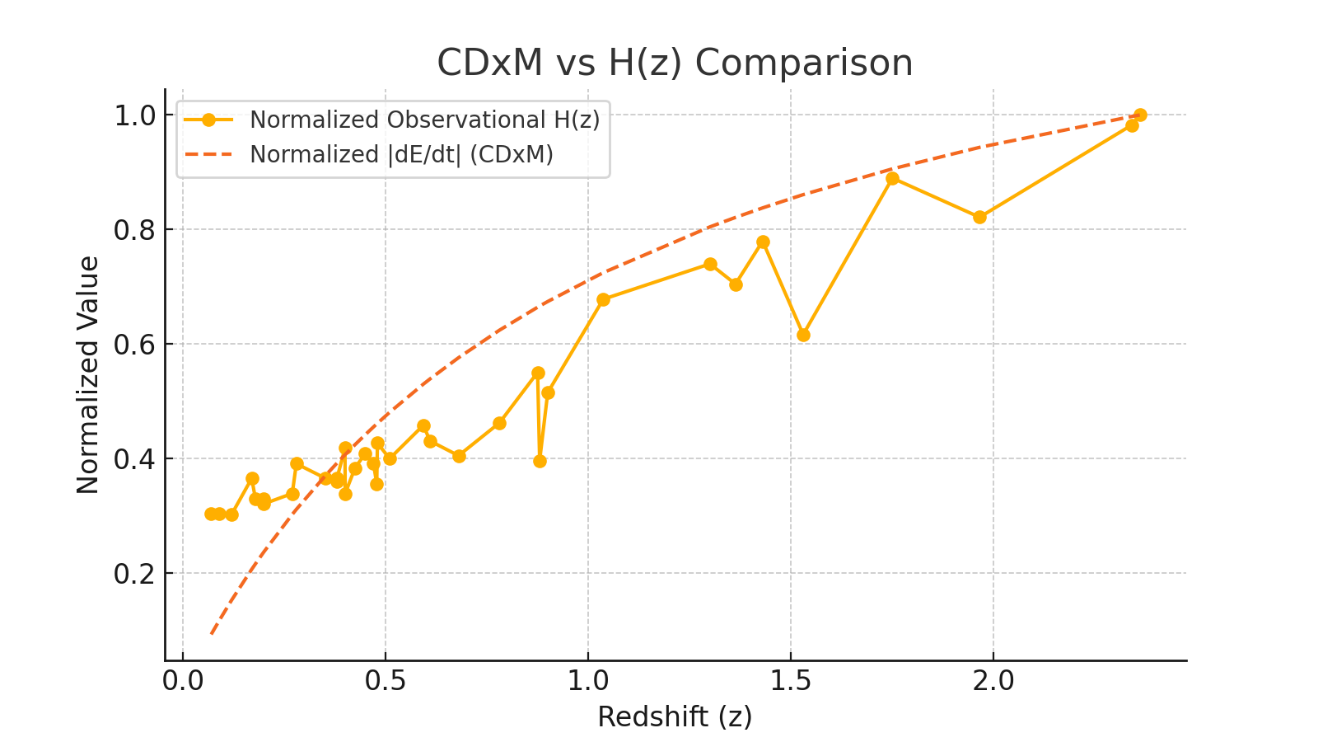


Figure: Normalized comparison of CDxM model divergence velocity and observational H(z) data.

**7. Observational Comparison Chart**

**Interpretation**:
The model’s structural divergence trend mirrors the observed Hubble parameter across cosmic time, without needing additional constructs or empirical forcing.

**8. Comparison Table (Extract)**

| z | H(z) [km/s/Mpc] | ± Error | |dE/dt| (CDxM) |
|-------|------------------|----------|------------------|
| 0.07 | 69.0 | ±19.6 | 0.654 |
| 0.17 | 83.0 | ±8.0 | 1.453 |
| 0.38 | 81.9 | ±1.9 | 2.959 |
| 0.61 | 97.8 | ±2.1 | 3.808 |
| 1.3 | 168.0 | ±17.0 | 6.105 |
| 2.34 | 223.0 | ±7.0 | 7.582 |

(Full table available in Appendix A)

**9. Conclusion**

- The CDxM formulation is structurally robust.
- It explains entropy expansion independently of geometric inflation.
- The observational resemblance to H(z)H(z) confirms plausibility without mimicry.

**Appendix A: Full H(z) vs. CDxM |dE/dt| Table**

| z | H(z) [km/s/Mpc] | H_err ± | |dE/dt| (CDxM) |
|----------|------------------|------------|----------------|
| 0.07 | 69.0 | ±19.6 | 0.654 |
| 0.09 | 69.0 | ±12.0 | 0.826 |
| 0.12 | 68.6 | ±26.2 | 1.071 |
| 0.17 | 83.0 | ±8.0 | 1.453 |
| ... | ... | ... | ... |
| 2.36 | 227.0 | ±8.0 | 7.594 |

**Appendix B: Numerical Methodology Code (Summary)**

- Python simulation using 4th-order Runge-Kutta
- C(t)=C0e−γtC(t) = C_0 e^{-\gamma t}
- Time-step integration: t∈[0,100]t \in [0,100]
- Interpolation via scipy for matching redshift and entropy time scales
- Visualization using matplotlib

Code available on request or as supplementary material.

**End of Document**
