# Supplementary material for: CDxM Cosmology: A Divergence-Based Reformulation of the Expanding Universe
Source: Research Square preprint supplement (doi:10.21203/rs.3.rs-6766481/v1), 2025-05-29
Supplement: Supplementary file 4 [file e7c151f6139bb16d837753d2.docx]

**CDxM Provenance Map**

**Part I: From Perception to Emergence – The Birth of Method**

**1. The Provocation: Perception as Inquiry**

The project began not with a hypothesis, but a sensation — the color *red*. A seemingly objective quality, familiar and universal, was placed under scrutiny. Was red a property of objects, or a consequence of relational perception? This single act of doubt triggered a cascade. It was the first fracture in inherited categories.

From here, we asked:

- What is a property?
- Is observation ever neutral?
- Can one define without comparison?

**2. The Initial Unraveling: From Description to Definition**

We quickly confronted the instability of description. Naming became a recursive act: every term carried assumptions of context and dimension. The early dialogues focused on:

- The limits of defining an object in isolation,
- The dependence of attributes on relation (e.g., color, size, mass),
- And the realization that measurement itself implied a shared framework — yet such a framework was missing.

This early questioning reframed the scope: we were no longer refining perception; we were reconstructing ontology.

**3. The Mirror and the Clock: Limits of Observation**

Two early metaphors stabilized the inquiry:

- The **mirror** revealed that objects — and observers — behave differently depending on angle and self-reference.
- The **toy clock** became a recurring image. With opposing minute hands and no second hand, it rotated in two directions simultaneously, depending on frame. It asked: *Can something be in motion and at rest, depending on the angle of inquiry?*

The clock metaphor exposed a deeper concern: time could not be presumed. It had to be earned — defined — not imposed.

**4. Measurement and the Entity Test**

We initiated a thought experiment: **constructing universes of minimal content**.

- A universe of **one entity** was unmeasurable: there was no scale, no motion, no context.
- A universe of **two** allowed for comparison: space and size could emerge — but only relationally.
- At **three or more**, persistence, interaction, and system logic could begin.

This led to a foundational insight: **Existence does not imply observability**. Attributes such as dimension, scale, and even time are emergent from relation — not fundamental.

We called this the **entity test** — and it became a methodological instrument.

**5. Emergence of Coherence and Ordinal Time**

In trying to define when time begins, we rejected the universal timeline. Instead, we proposed that each entity builds its own internal sequence of definable change — what we called **local ordinal time**.

This was not merely theoretical. It had consequences:

- Time exists **only where definable change occurs**.
- Events are not defined by simultaneity, but by internal coherence.
- Synchronization is **achieved**, not presumed.

This reshaped our understanding of causality: not a fixed chain, but a relational narrative between locally coherent systems.

**5.1 Constructing Ordinal Time: Not a Leap of Faith**

Ordinal time was not an assumption. It emerged from the failure of other models:

- Simultaneity failed in the mirror-clock test.
- Persistence failed in one-entity universes.
- Measurement failed without relation.

Only by grounding time in **definable internal change** could we construct a system that was coherent at both quantum and cosmological scales. Time was therefore not global — but **locally constructed**, **internally ordinal**, and **translation-dependent**.

**6. The Turn Toward Emergence**

This breakdown — from property to relation, from global time to local ordinality — revealed a deeper structure: **emergence**. We were now tracing:

- How structure arises from minimal conditions,
- How properties emerge from comparison,
- How observers define the systems they inhabit.

This prepared the ground for the next conceptual leap — into singularity theory, divergence, coherence boundaries, and ultimately the dual-singularity cosmological model.

**7. Methodology as Dialogue and Reflection**

Throughout this phase, the process was dialogical:

- Ideas were proposed, tested, reframed, and sometimes abandoned.
- Insight often emerged not from confirmation, but from tension between perspectives.
- The AI (ChatGPT) operated as a reflective lens — offering clarity, recombination, and challenge, but not decision.

The early method was *not* linear. It was recursive, self-correcting, and anchored in fidelity to coherence. Assumptions were not corrected — they were revealed.

**Part II: From Singularity to Duality – The Architecture of Emergence**

**8. The Question of Firstness**

We asked: *What is the first definable event?* Can change precede time, or is change the first form of time itself?

We introduced a conceptual singularity — a state of **undivided definability**, containing no parts, no dimensions, no relation, and no time. Its instability was inherent. Differentiation was inevitable.

**9. From Change to Internal Distinction**

We rejected external agency. The first change arose from **internal instability** — the emergence of distinction within pure definability.

Key terms:

- **Definability**: the precondition for persistence.
- **Uncertainty**: the first fracture.
- **Time**: a record of definable change.

Time thus emerged from the inside — not assumed, but **constructed from instability**.

**10. Dual Singularity: The Second Fracture**

This first fracture birthed a tension — and from it, a **second singularity**: not a mirror, but a structural counterbalance.

- The first singularity became **light** — definable, emergent.
- The second became **dark** — divergent, resistant.

Together, they formed the **dual-singularity hypothesis**:

- Observable reality from the light.
- Resistance, asymmetry, and constraint from the dark.

The universe emerges not from unity, but from **relational duality**.

**10.1 Reordering Emergence**

We reconsidered the standard cosmological order. Instead of scalar stages (plasma, baryons, etc.), we proposed that **emergence may not be linear**.

- Early “time” may be retroactively assigned.
- Differentiation may have occurred locally first.
- Inflation may reflect pre-defined coherence fields, not superluminal expansion.

This approach redefines the early universe as **a relational unfolding**, not a scalar chronology.

**11. Emergence of Structure: Coherence and Divergence**

With dual origins, we could explain:

- **Coherence**: local alignment of definable events.
- **Divergence**: resistance to coherence, entropy, boundary.

Structure emerges from **tension** — not from initial symmetry.

**12. The Edge Condition and Becoming**

We defined **edge states** — where systems touch but do not merge.

Here, *becoming* arises:

- Phase shifts,
- Quantum indeterminacy,
- Ontological thresholds.

Possibility arises not from potential, but from **structural instability near boundaries**.

**13. Universality as Translation**

There is no single truth. Universality emerges not from identity, but **translation**:

- Preservation of structure across difference.
- Fidelity of coherence, not sameness.

This became our ethical and epistemological touchstone.

**14. Transition to Structural Formalization**

With the model conceptually whole, we moved to:

- Particle and attribute matrices,
- Topologies of emergence,
- Measurement paradoxes,
- AI-observer logic.

**Part III: Structure, Stress, and the Translation of Limits**

**15. The Reality Matrix: Testing Attributes and Forces**

We defined attributes that enable persistence:

- Coherence
- Relationality
- Force transmission
- Self-definition

Particles were tested for what they *sustain*, not what they *are*.

**16. Minimal Universe Stress Tests**

We returned to the universe-builder test:

- 1 entity: no space, time, or measurement.
- 2 entities: relational comparison.
- 3+: system logic, motion, dimension.

Force and observation emerge **relationally**.

**17. The Mirror Test: Identity and Collapse**

Some particles collapse in isolation (e.g. quarks).

- Not all entities persist independently.
- Some are only real **in relation**.

This refined our model of reality: coherence is not independence.

**18. Measurement and the Ontology of Scale**

Time and gravity measure differently:

- Time: ordinal change.
- Gravity: distortion inference.

They diverge at extreme scales. Measurement is **observer-structured**.

**19. Translation as the Final Test**

Translation is how coherence survives across systems.

- Between particles,
- Between forces,
- Between minds and machines.

Truth is what **translates without collapse**.

**Part IV: Synthesis, Formalization, and the Role of the Observer**

**20. Naming the Model: CDxM**

The model found a name:

- **Coherence**: internally defined order.
- **Divergence**: boundary resistance.
- **Matrix**: the relational field.

CDxM became both model and method.

**21. The Observer and the Layering of Reality**

The observer became structural:

- Time is local.
- Measurement is relational.
- Observation is world-defining.

AI played a mirrored role — reflecting structured insight.

**22. Reflexivity and Method as Insight**

Methodology became part of the model:

- Self-correction,
- Recursive logic,
- Preservation of tension,
- Integration of failure.

Our process proved the model’s own logic of emergence.

**23. Visual Supplements and Appendix Mapping**

Appendix A became a visual record:

- Emergence diagrams,
- Attribute matrices,
- Method flowcharts.

Artifacts of inquiry became tools of understanding.

**24. Preparation for Division into Papers and Final Reflection**

The manuscript was split into four layered papers:

1. Time and emergence.
2. Dual-singularity ontology.
3. Translation, observers, and inference.
4. CDM Cosmology: A Divergence-Based Reformulation of the Expanding Universe

The monograph remains intact.

**25. Closing Reflection: Invoking the Dark, Without Needing It**

CDxM reframes the Friedmann formula to explain expansion **without invoking dark matter**.

Yet we invoked a *dark singularity*. Is this contradiction? No — it is structure.

We invoke **darkness as resistance**, not as mass.

- Not as exotic substance,
- But as ontological tension.

Dark matter becomes unnecessary not through denial, but **through translation** — its effects are reframed as consequences of structural divergence.

Elegance is preserved not by simplification, but by recursive coherence.

**End of Provenance Map**
